# Supplementary material
Source: Springer Nature journal article supplement (https://www.springermedizin.de/resource/supplementary/13561_2012_57_MOESM1_ESM.pdf/9687376)

# Cost-effectiveness plane

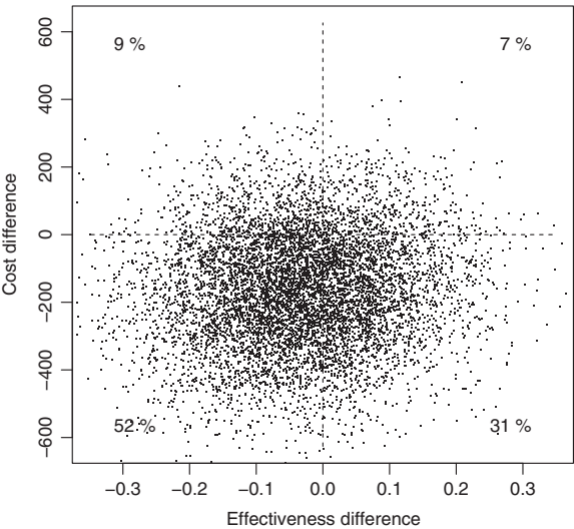

Supplement: MOESM1 [file 9687376]
